# Supplementary material
Source: publisher site journal article supplement (https://www.e-cmh.org/upload/media/cmh-2022-0316-Supplementary-Fig28.pdf)
Supplement: Supplementary file 1 [file cmh-2022-0316-Supplementary-Fig28.pdf]

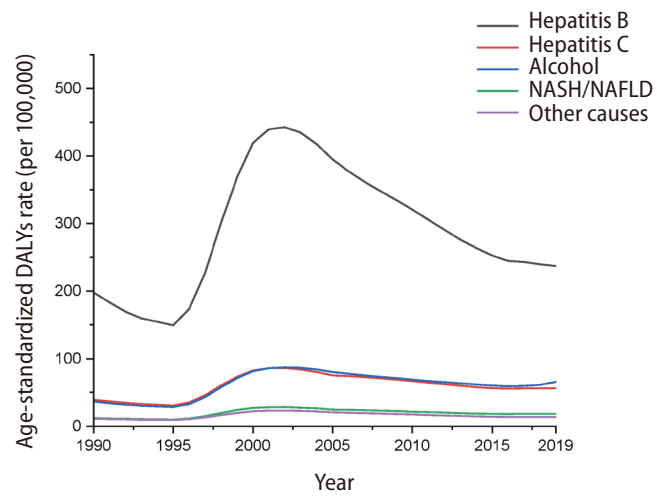

**Supplementary Figure 28.** Age-standardized DALY rates of liver cancer due to causes in the Republic of Korea from 1990 to 2019. DALY, disease-adjusted life year; NASH, non-alcoholic steatohepatitis; NAFLD, non-alcoholic fatty liver disease.
